# Supplementary material
Source: Springer Nature journal article supplement (https://www.springermedizin.de/resource/supplementary/12963_2011_157_MOESM2_ESM.pdf/9572778)

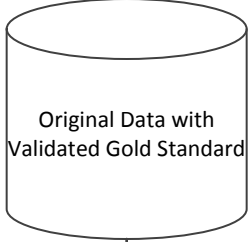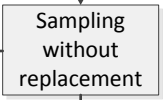

25%

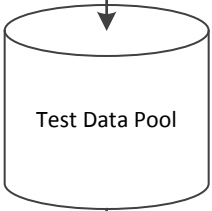

75%

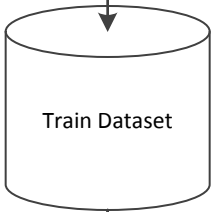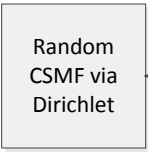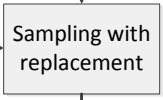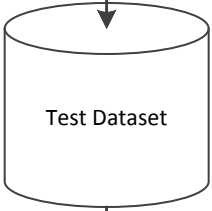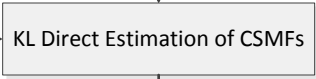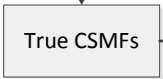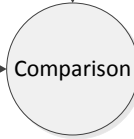

Accuracy

Supplement: MOESM2 [file 9572778]
